# Supplementary material for: GPR56/ADGRG1 regulates development and maintenance of peripheral myelin
Source: PubMed Central journal article supplement — J Exp Med. 2018 Mar 5;215(3):941–61. doi: 10.1084/jem.20161714 (PMC5839751; doi:10.1084/jem.20161714), 2018-03-05

**A**

2 4 6 8 10

 $-\log(\text{pValue})$ *P3 downregulated  
GO processes*1  
2  
3  
4  
5  
6  
7  
8  
9  
10

- 1. cell cycle
- 2. mitotic cell cycle
- 3. mitotic cell cycle process
- 4. cell cycle process
- 5. cell division
- 6. organelle organization
- 7. nuclear division
- 8. organelle fission
- 9. baroreceptor response to increased systemic arterial blood pressure
- 10. DNA metabolic process

Processes

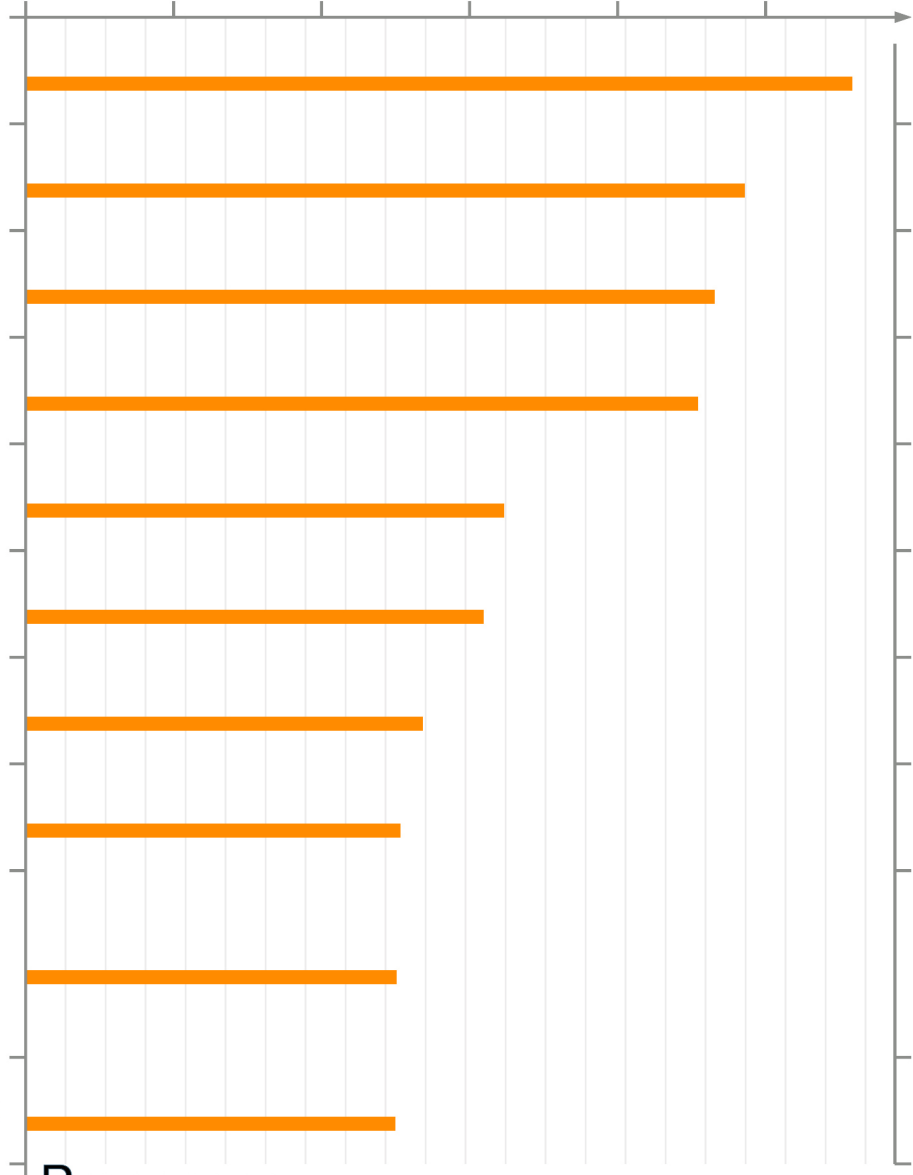

**B**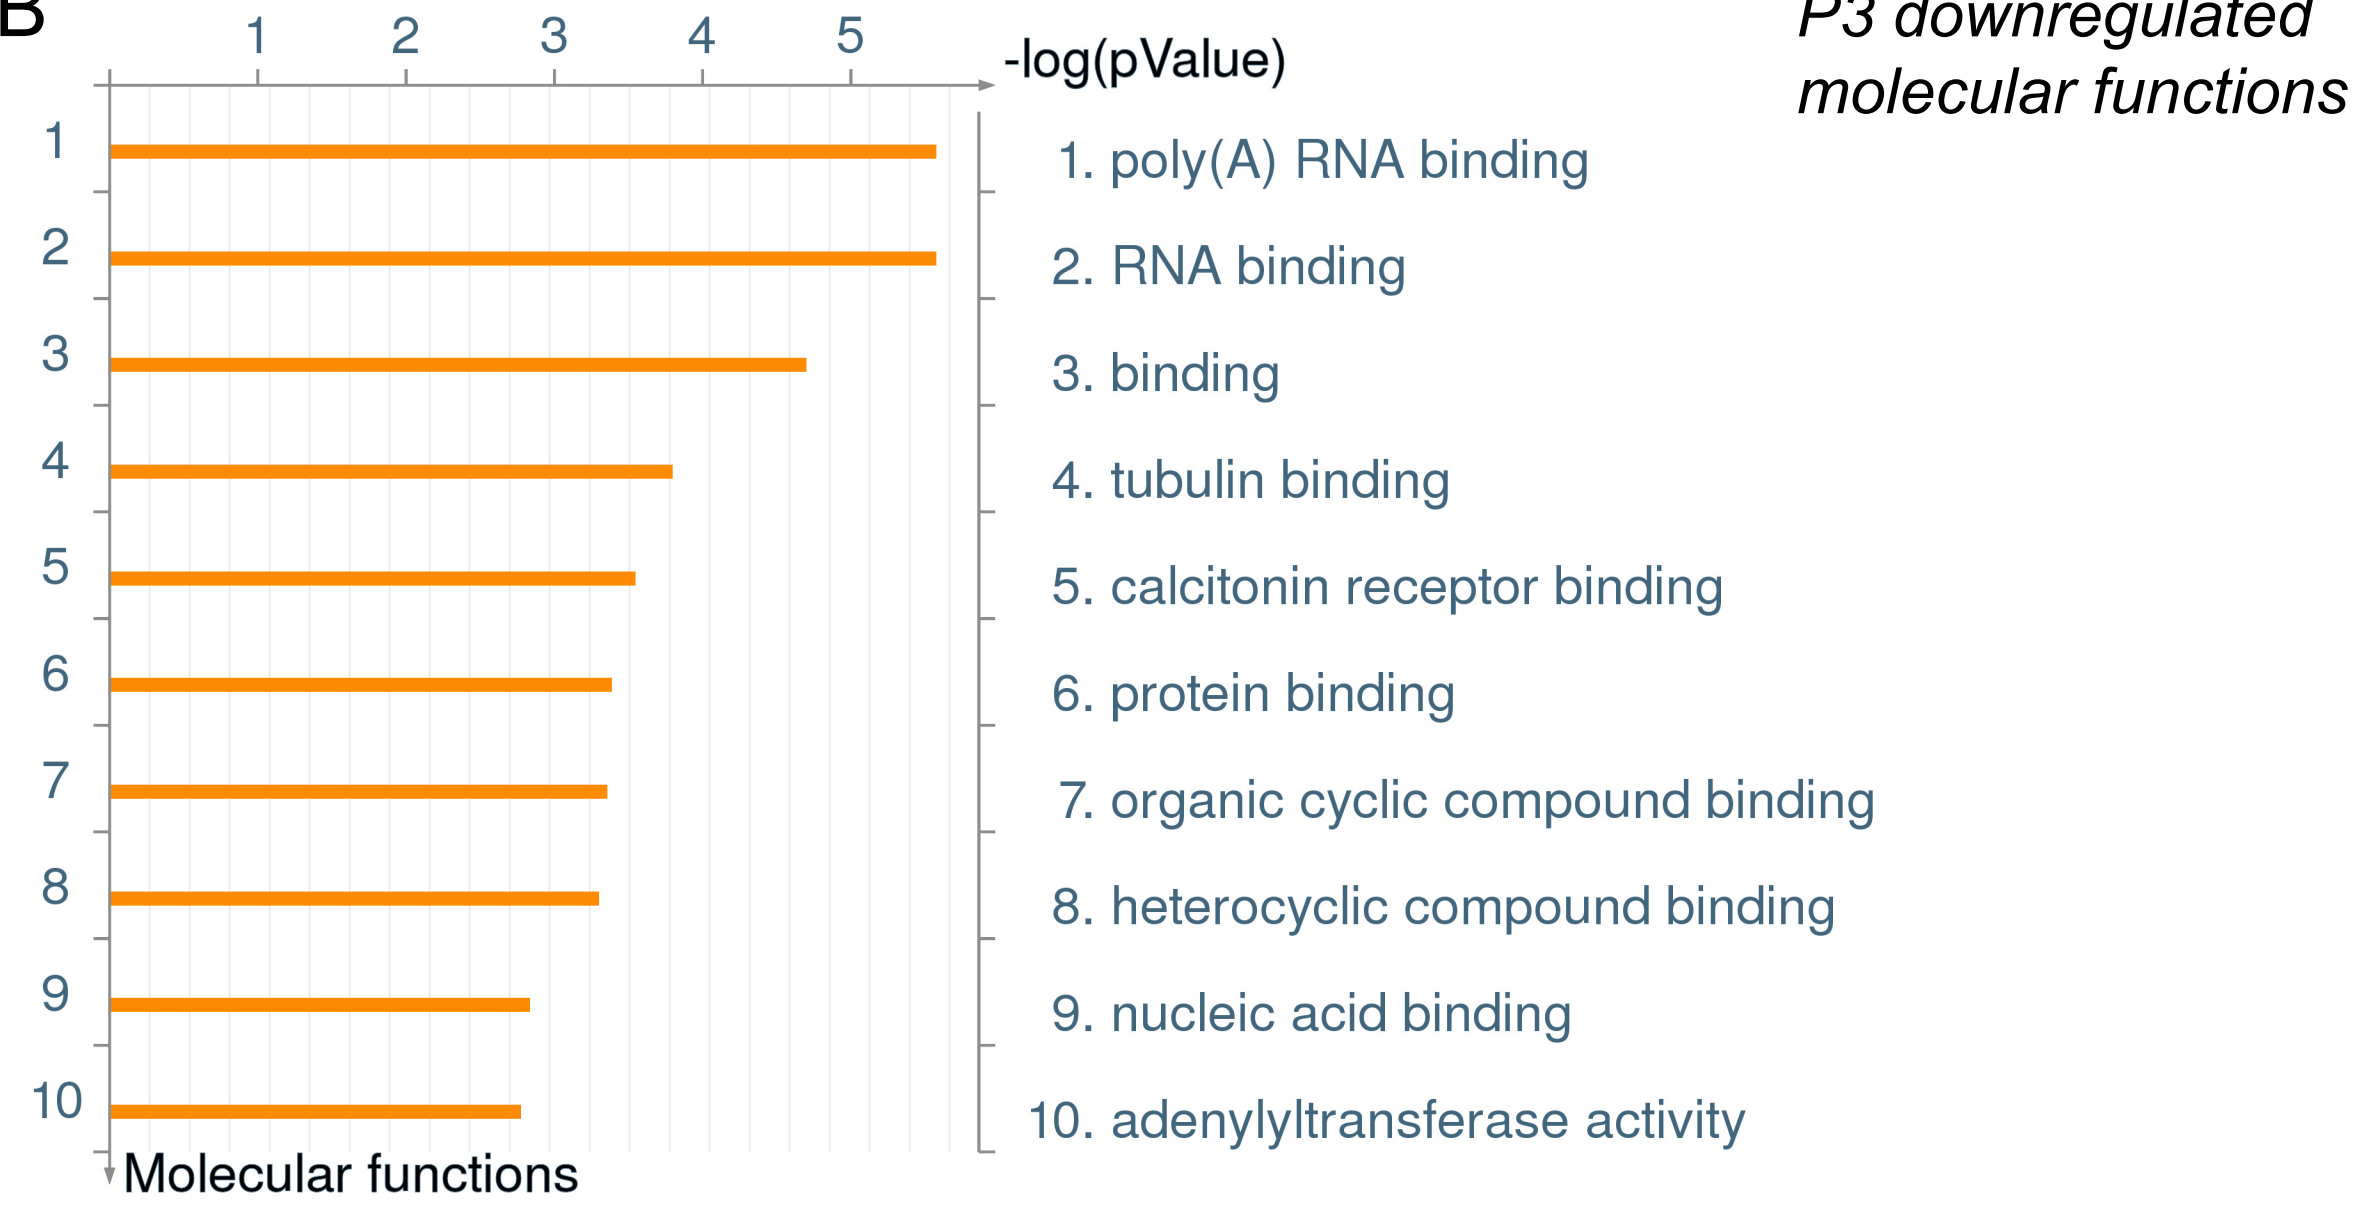

C

*P3 downregulated pathway maps*

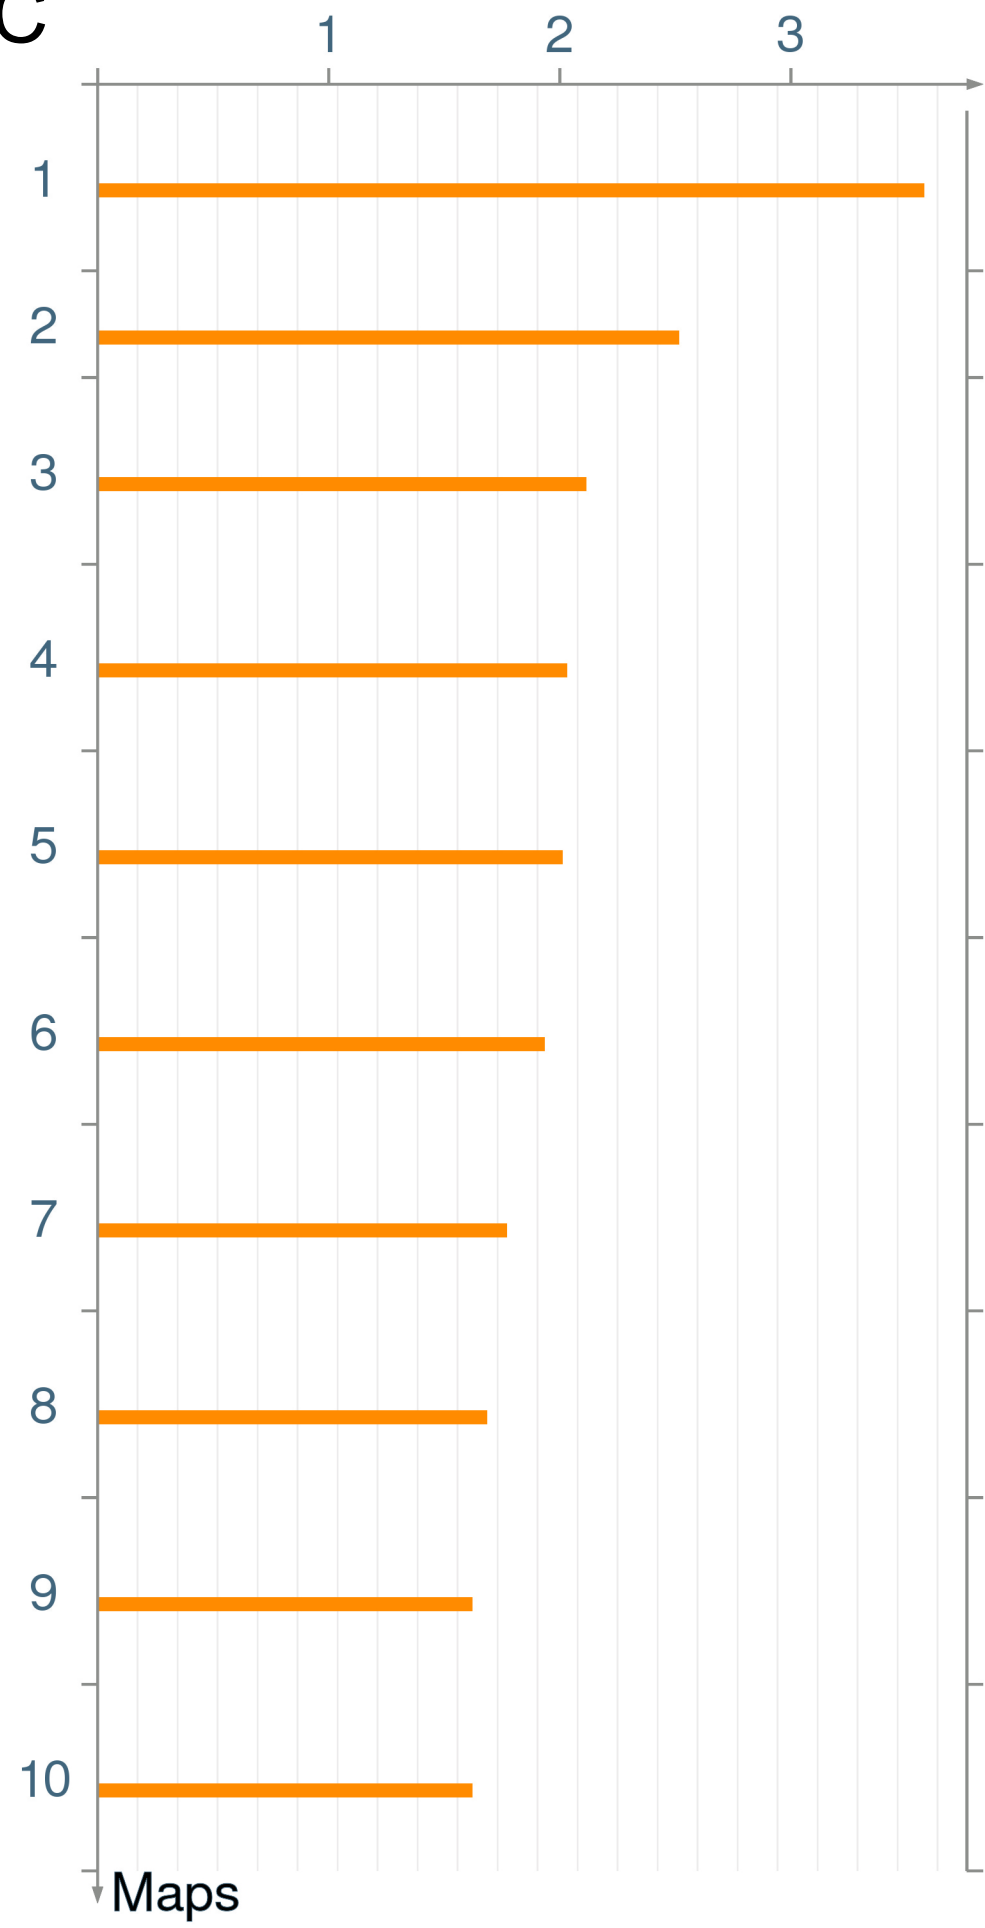

-log(pValue)

1. Cell cycle\_Transition and termination of DNA replication
2. Transport\_RAN regulation pathway
3. Apoptosis and survival\_p53-dependent apoptosis
4. DNA damage\_ATM/ATR regulation of G1/S checkpoint
5. Histidine-glutamate-glutamine metabolism
6. G-protein signaling\_Regulation of RAC1 activity
7. Immune response\_IL-1 signaling pathway
8. Immune response\_Bacterial infections in normal airways
9. Apoptosis and survival\_Role of PKR in stress-induced apoptosis
10. Translation\_Regulation of EIF4F activity

Maps

**D**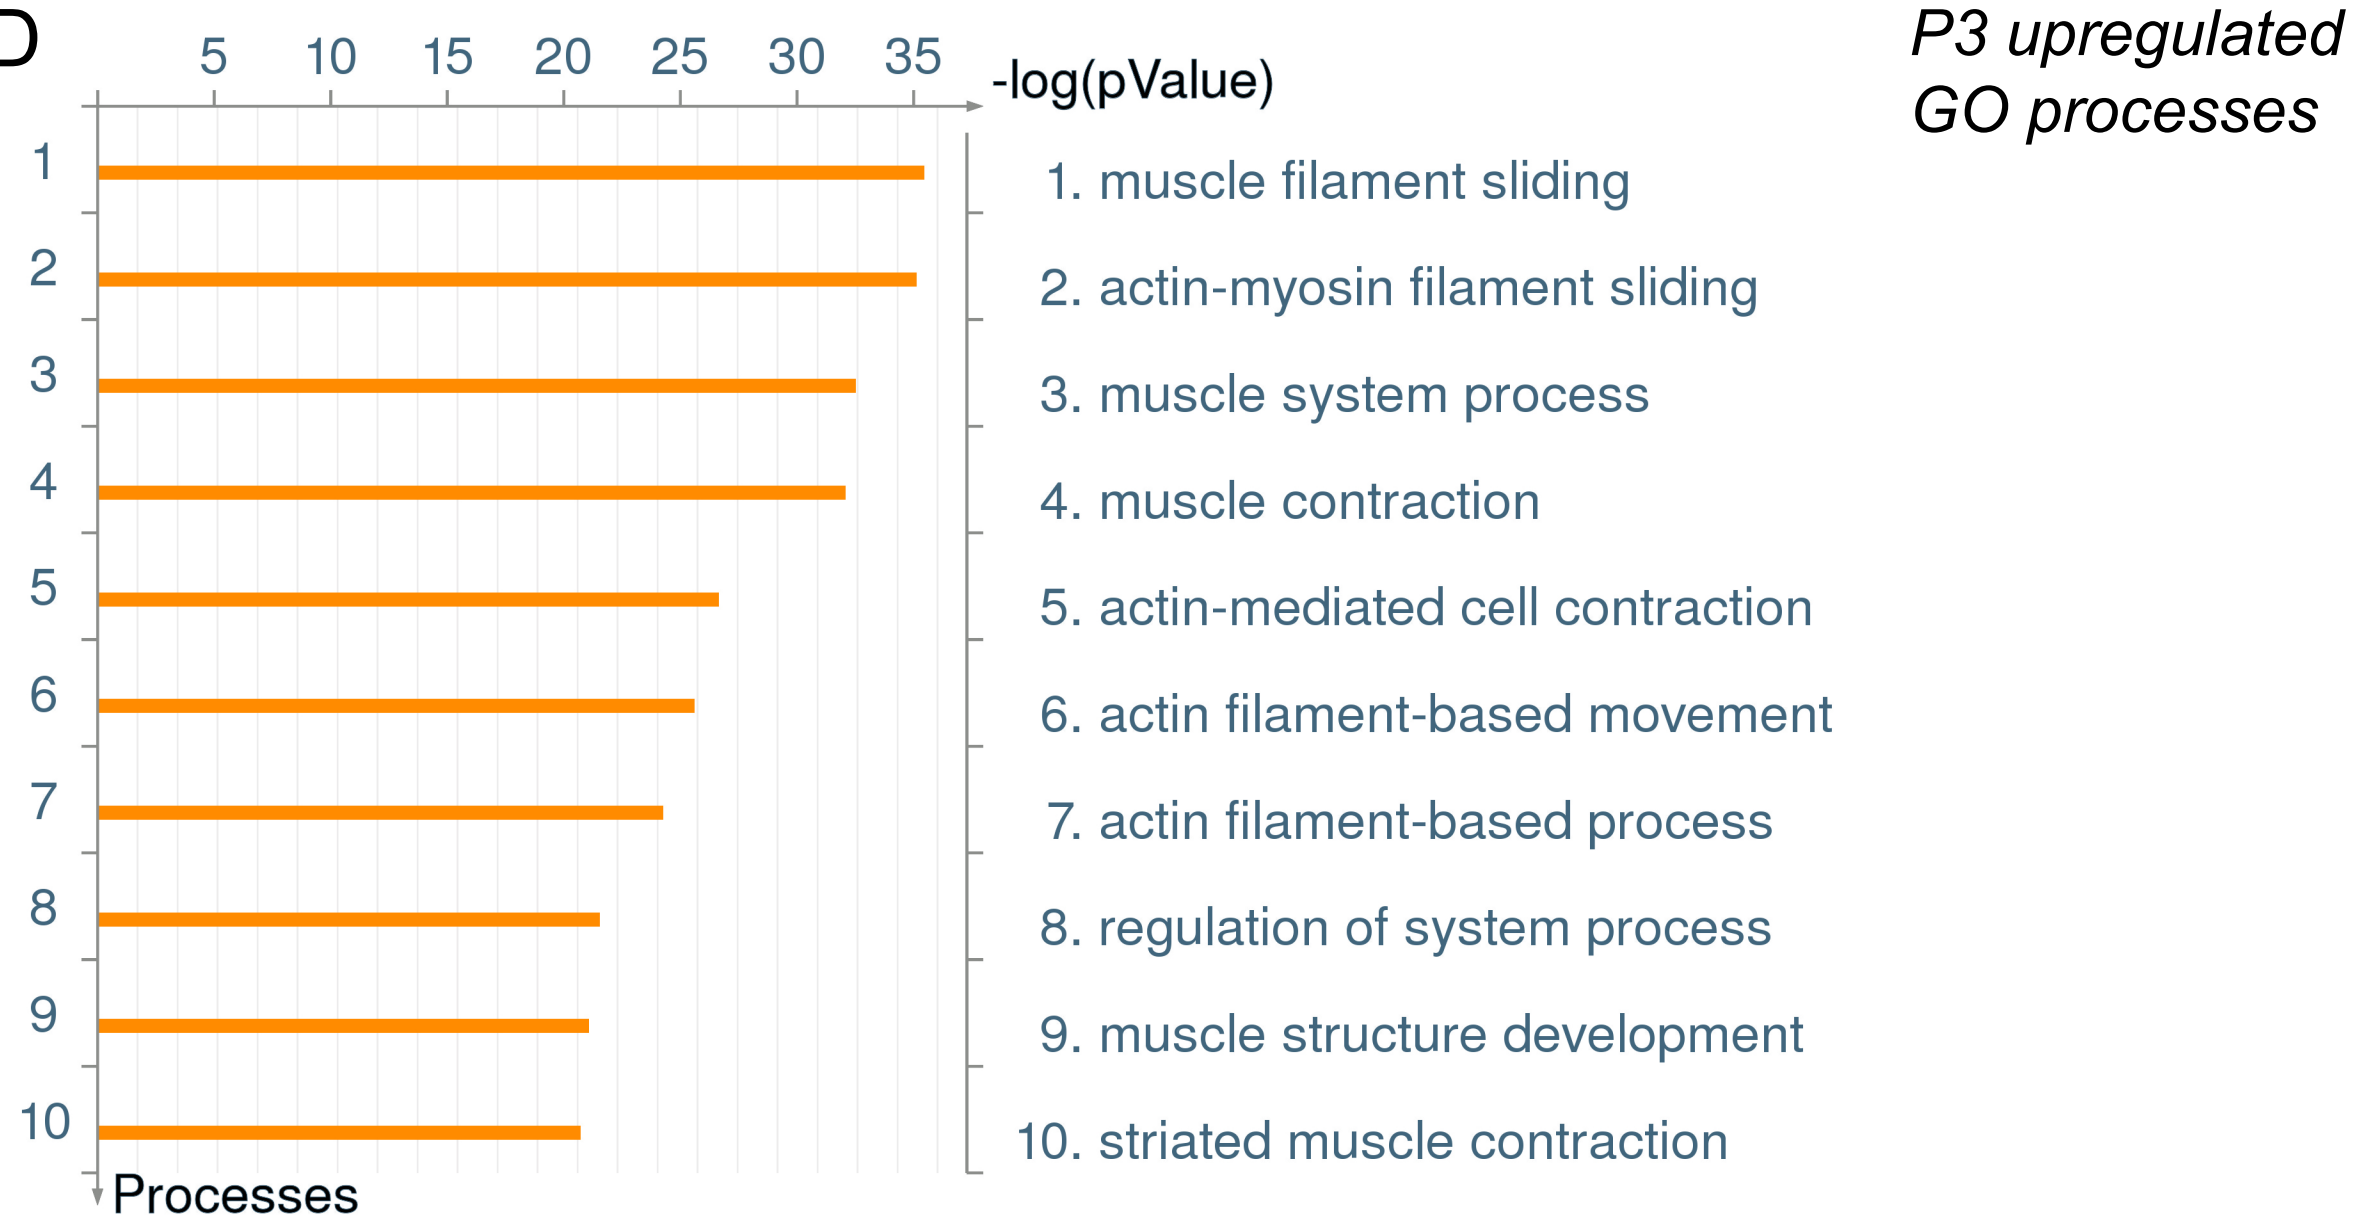

**E**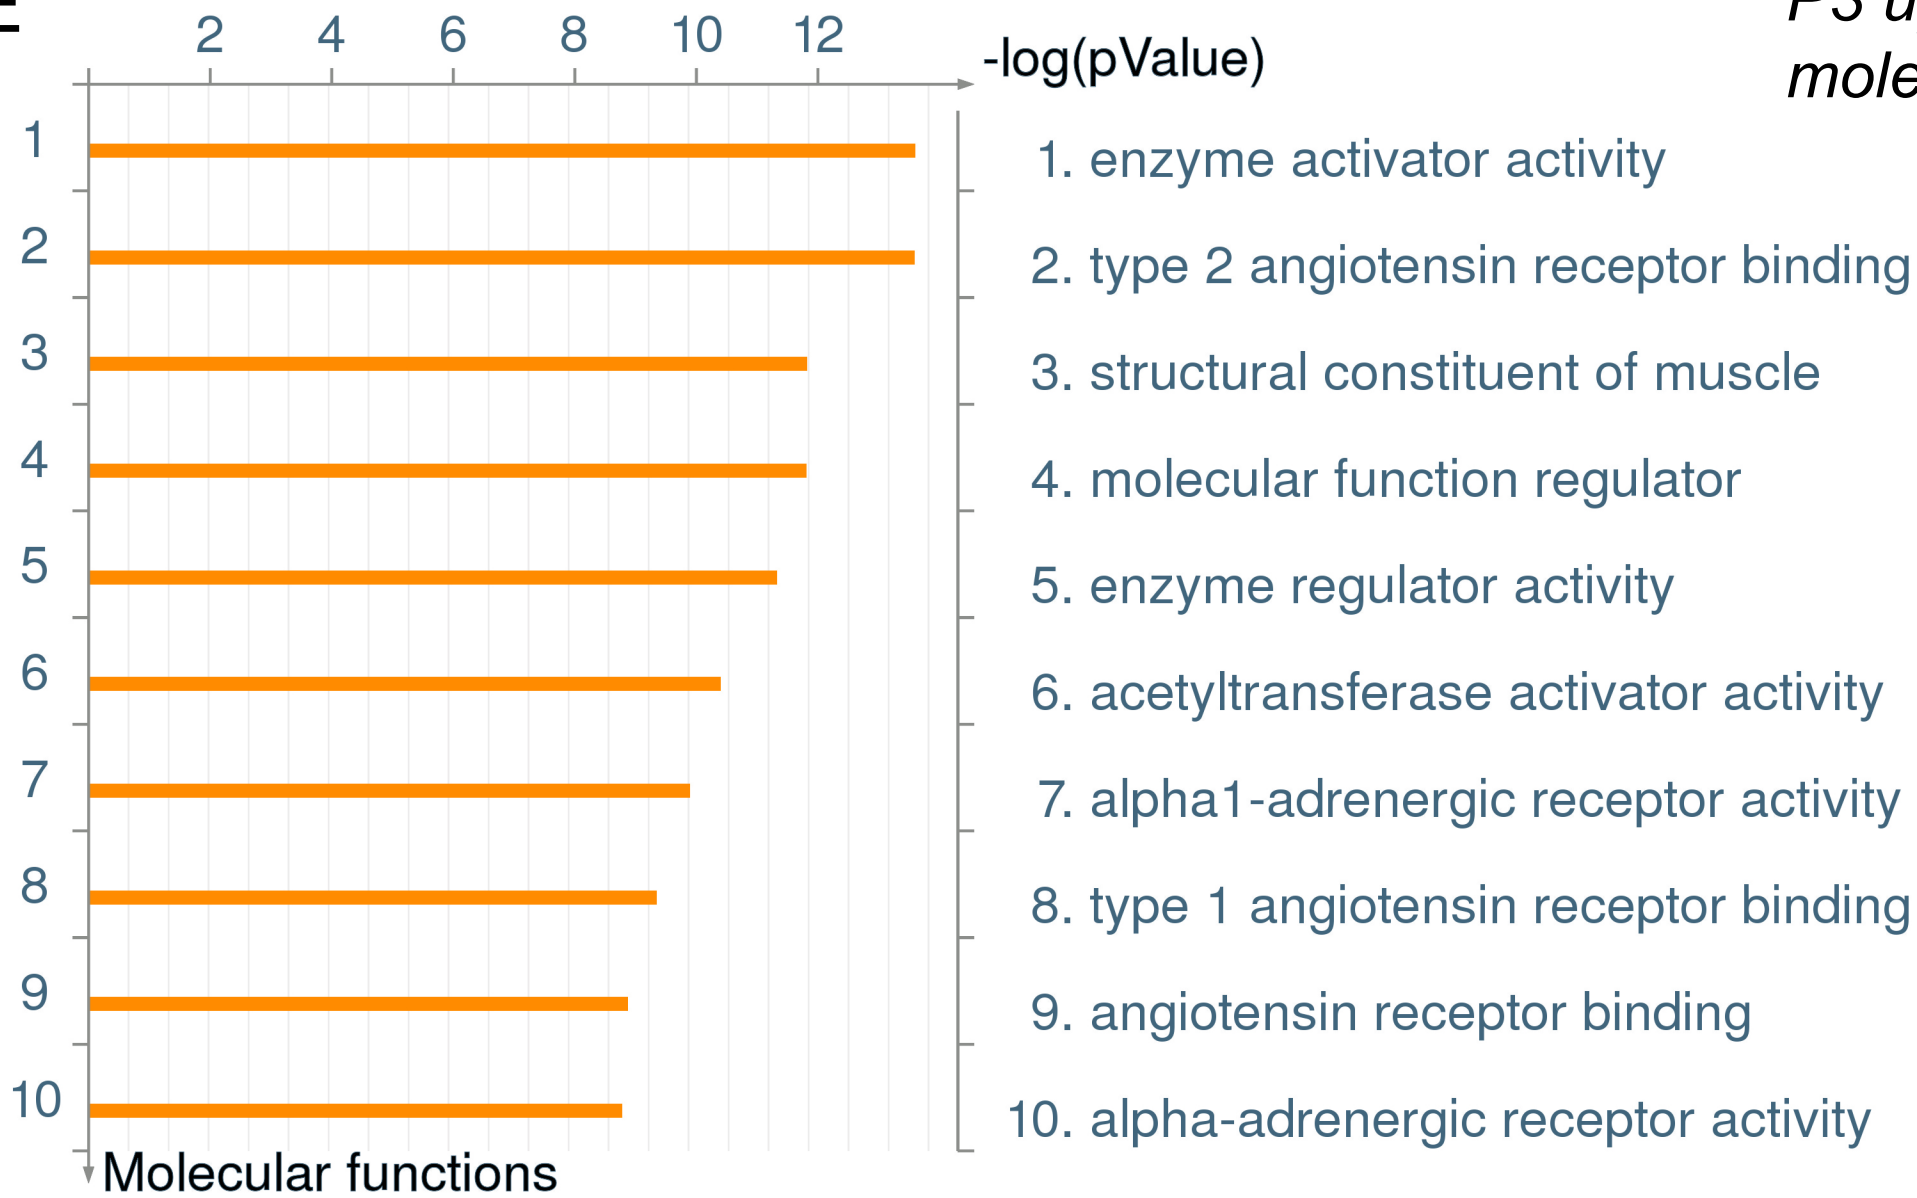

*P3 upregulated  
molecular functions*

**F***P3 upregulated  
pathway maps*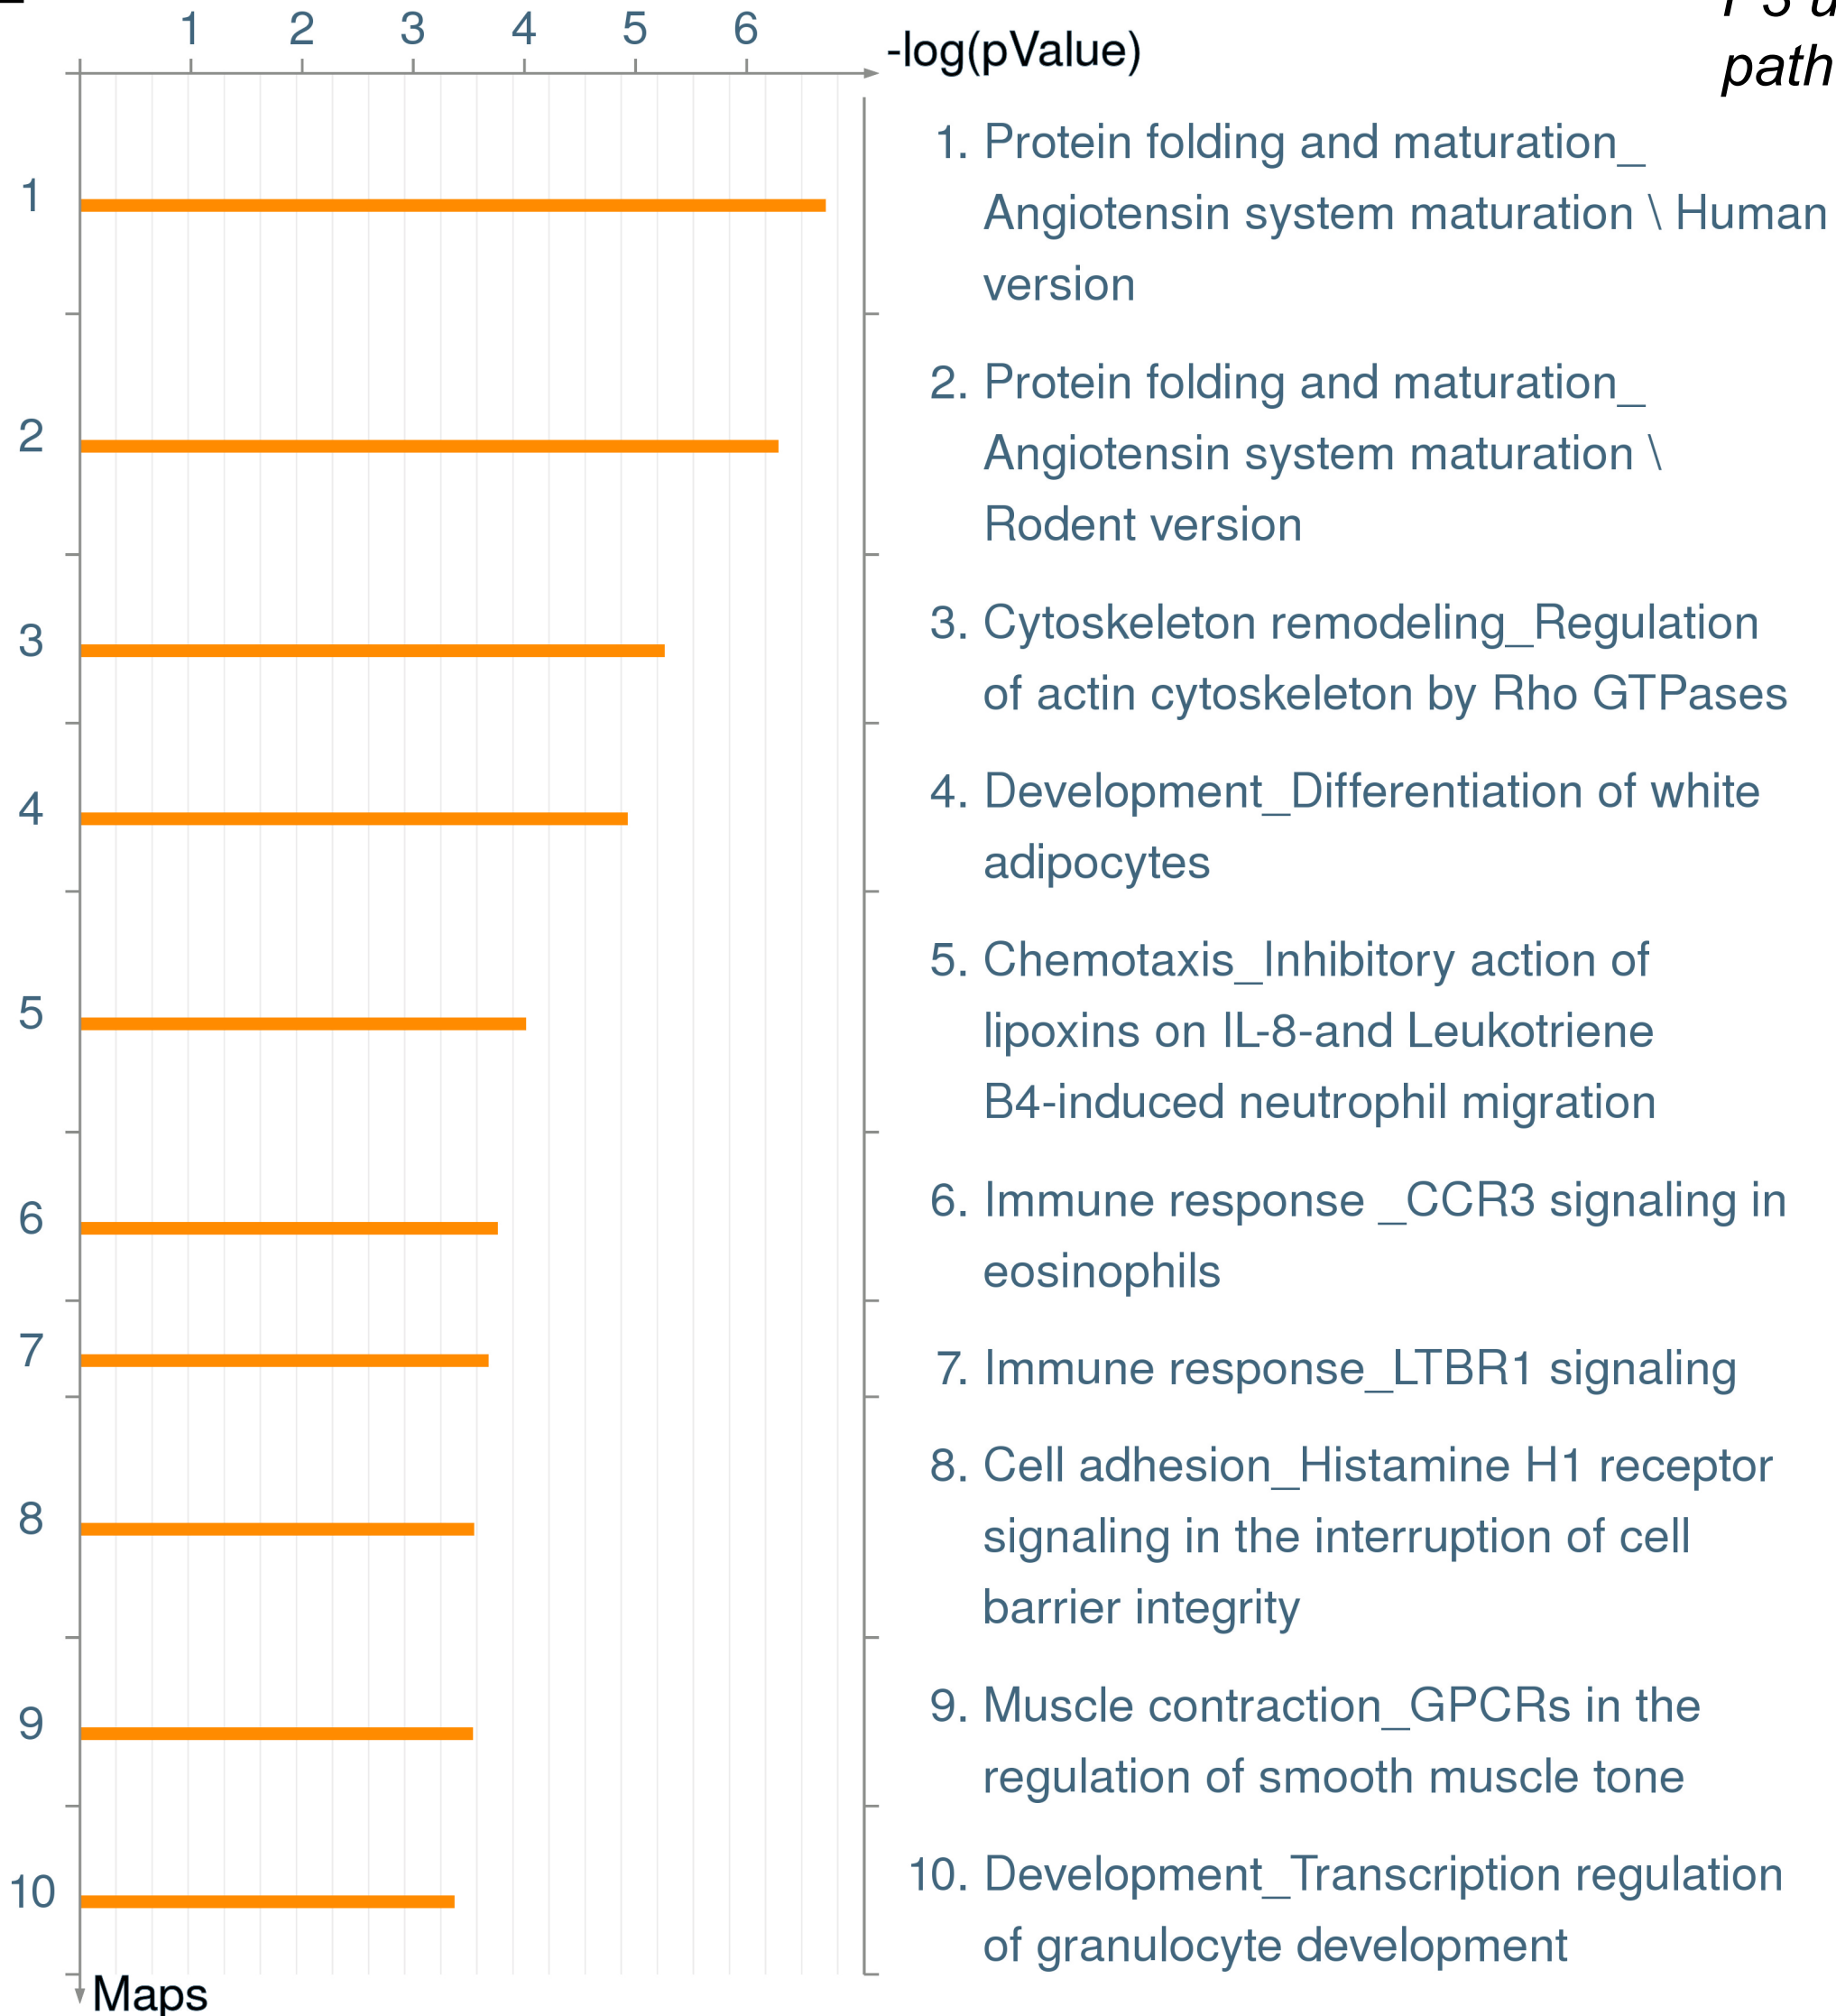

Maps

G

*P21 downregulated  
GO processes*

2 4 6 8 10

$-\log(\text{pValue})$

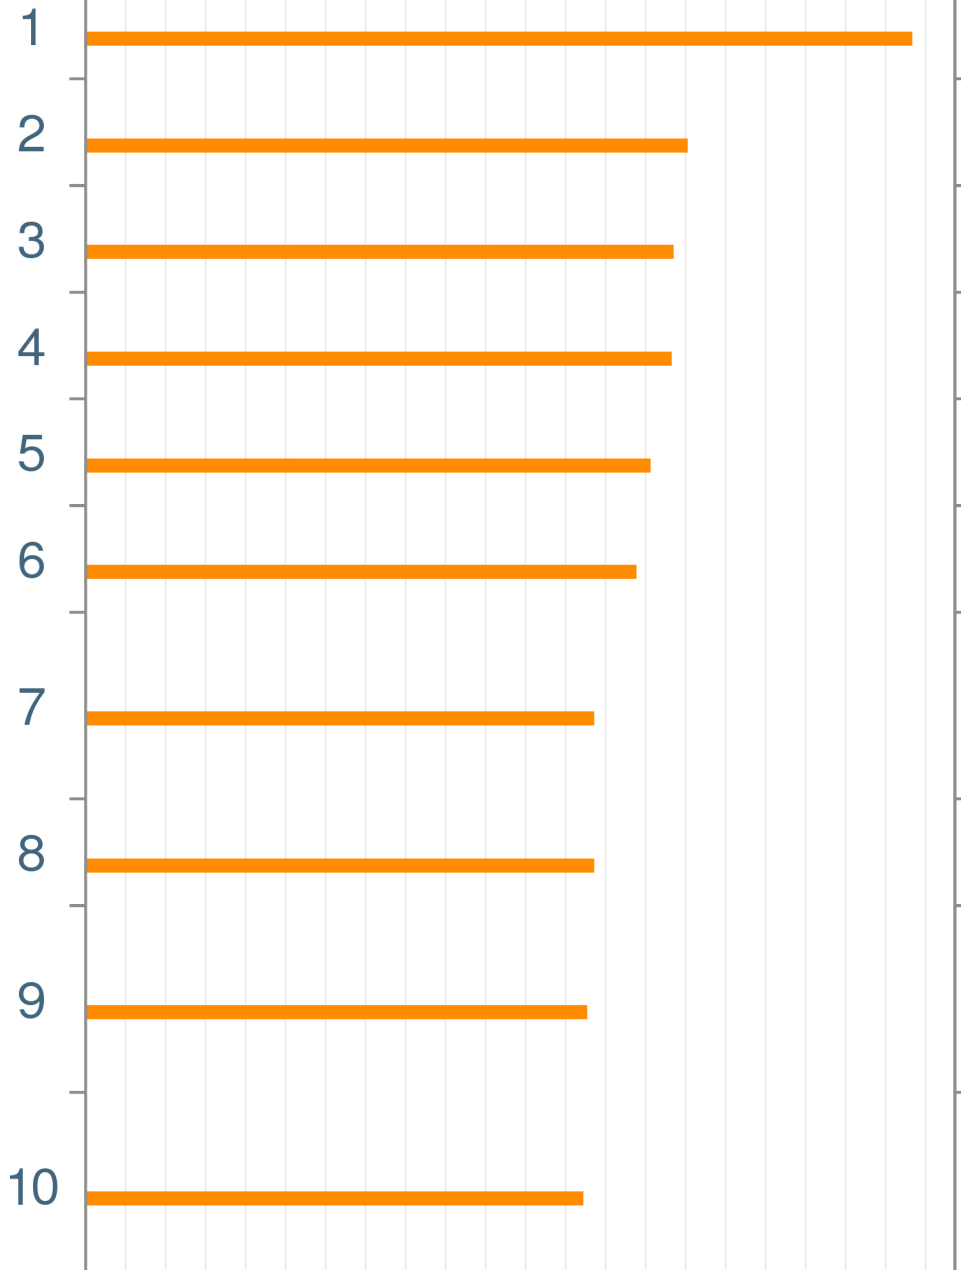

1. response to stress
2. cell death
3. ferrous iron import into cell
4. defense response
5. ferrous iron transport
6. ferrous iron import
7. positive regulation of acute inflammatory response
8. response to virus
9. regulation of oligodendrocyte progenitor proliferation
10. positive regulation of arachidonic acid secretion

Processes

**H**

2 4 6 8 10

 $-\log(\text{pValue})$ *P21 downregulated  
molecular functions*1  
2  
3  
4  
5  
6  
7  
8  
9  
10

1. protein binding
2. binding
3. catalytic activity
4. recombinase activity
5. hydrolase activity
6. hepoxilin-epoxide hydrolase activity
7. ether hydrolase activity
8. glutathione peroxidase activity
9. hepoxilin A3 synthase activity
10. type 2A serotonin receptor binding

Molecular functions

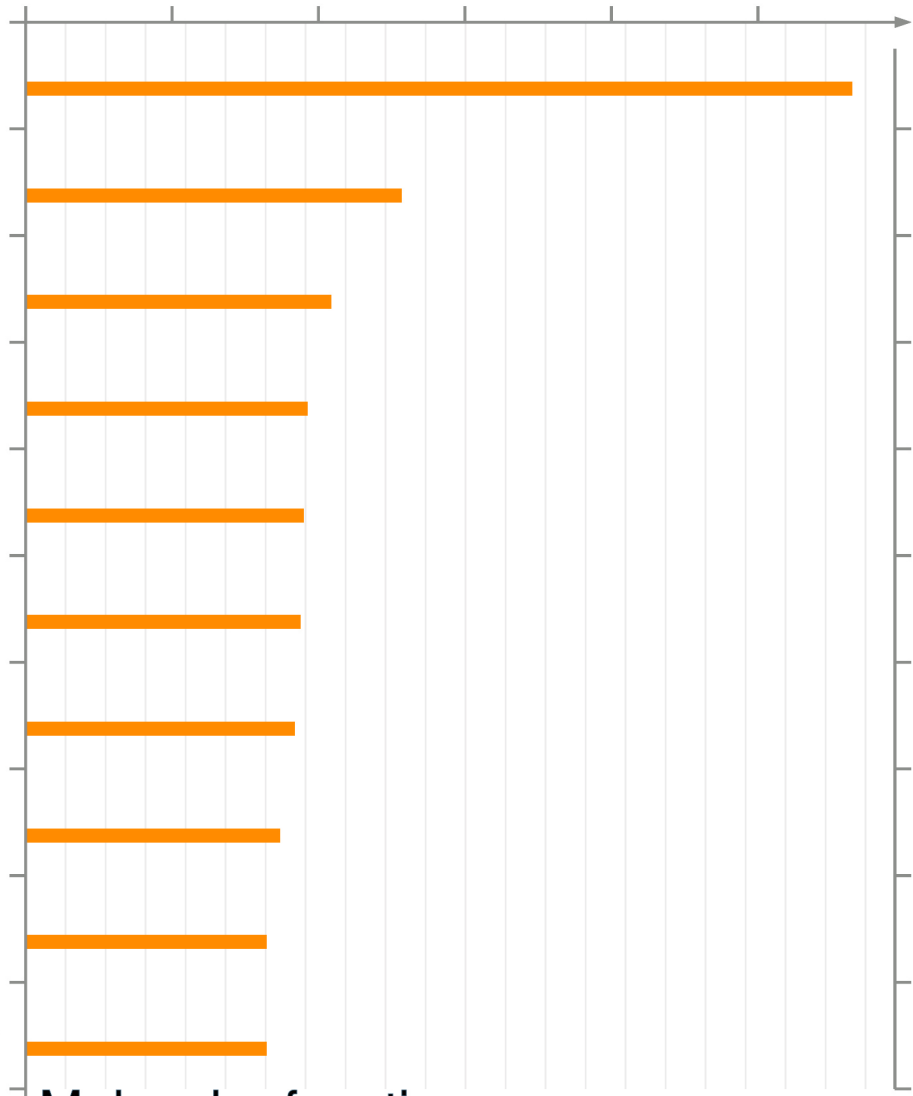



*P21 downregulated  
pathway maps*

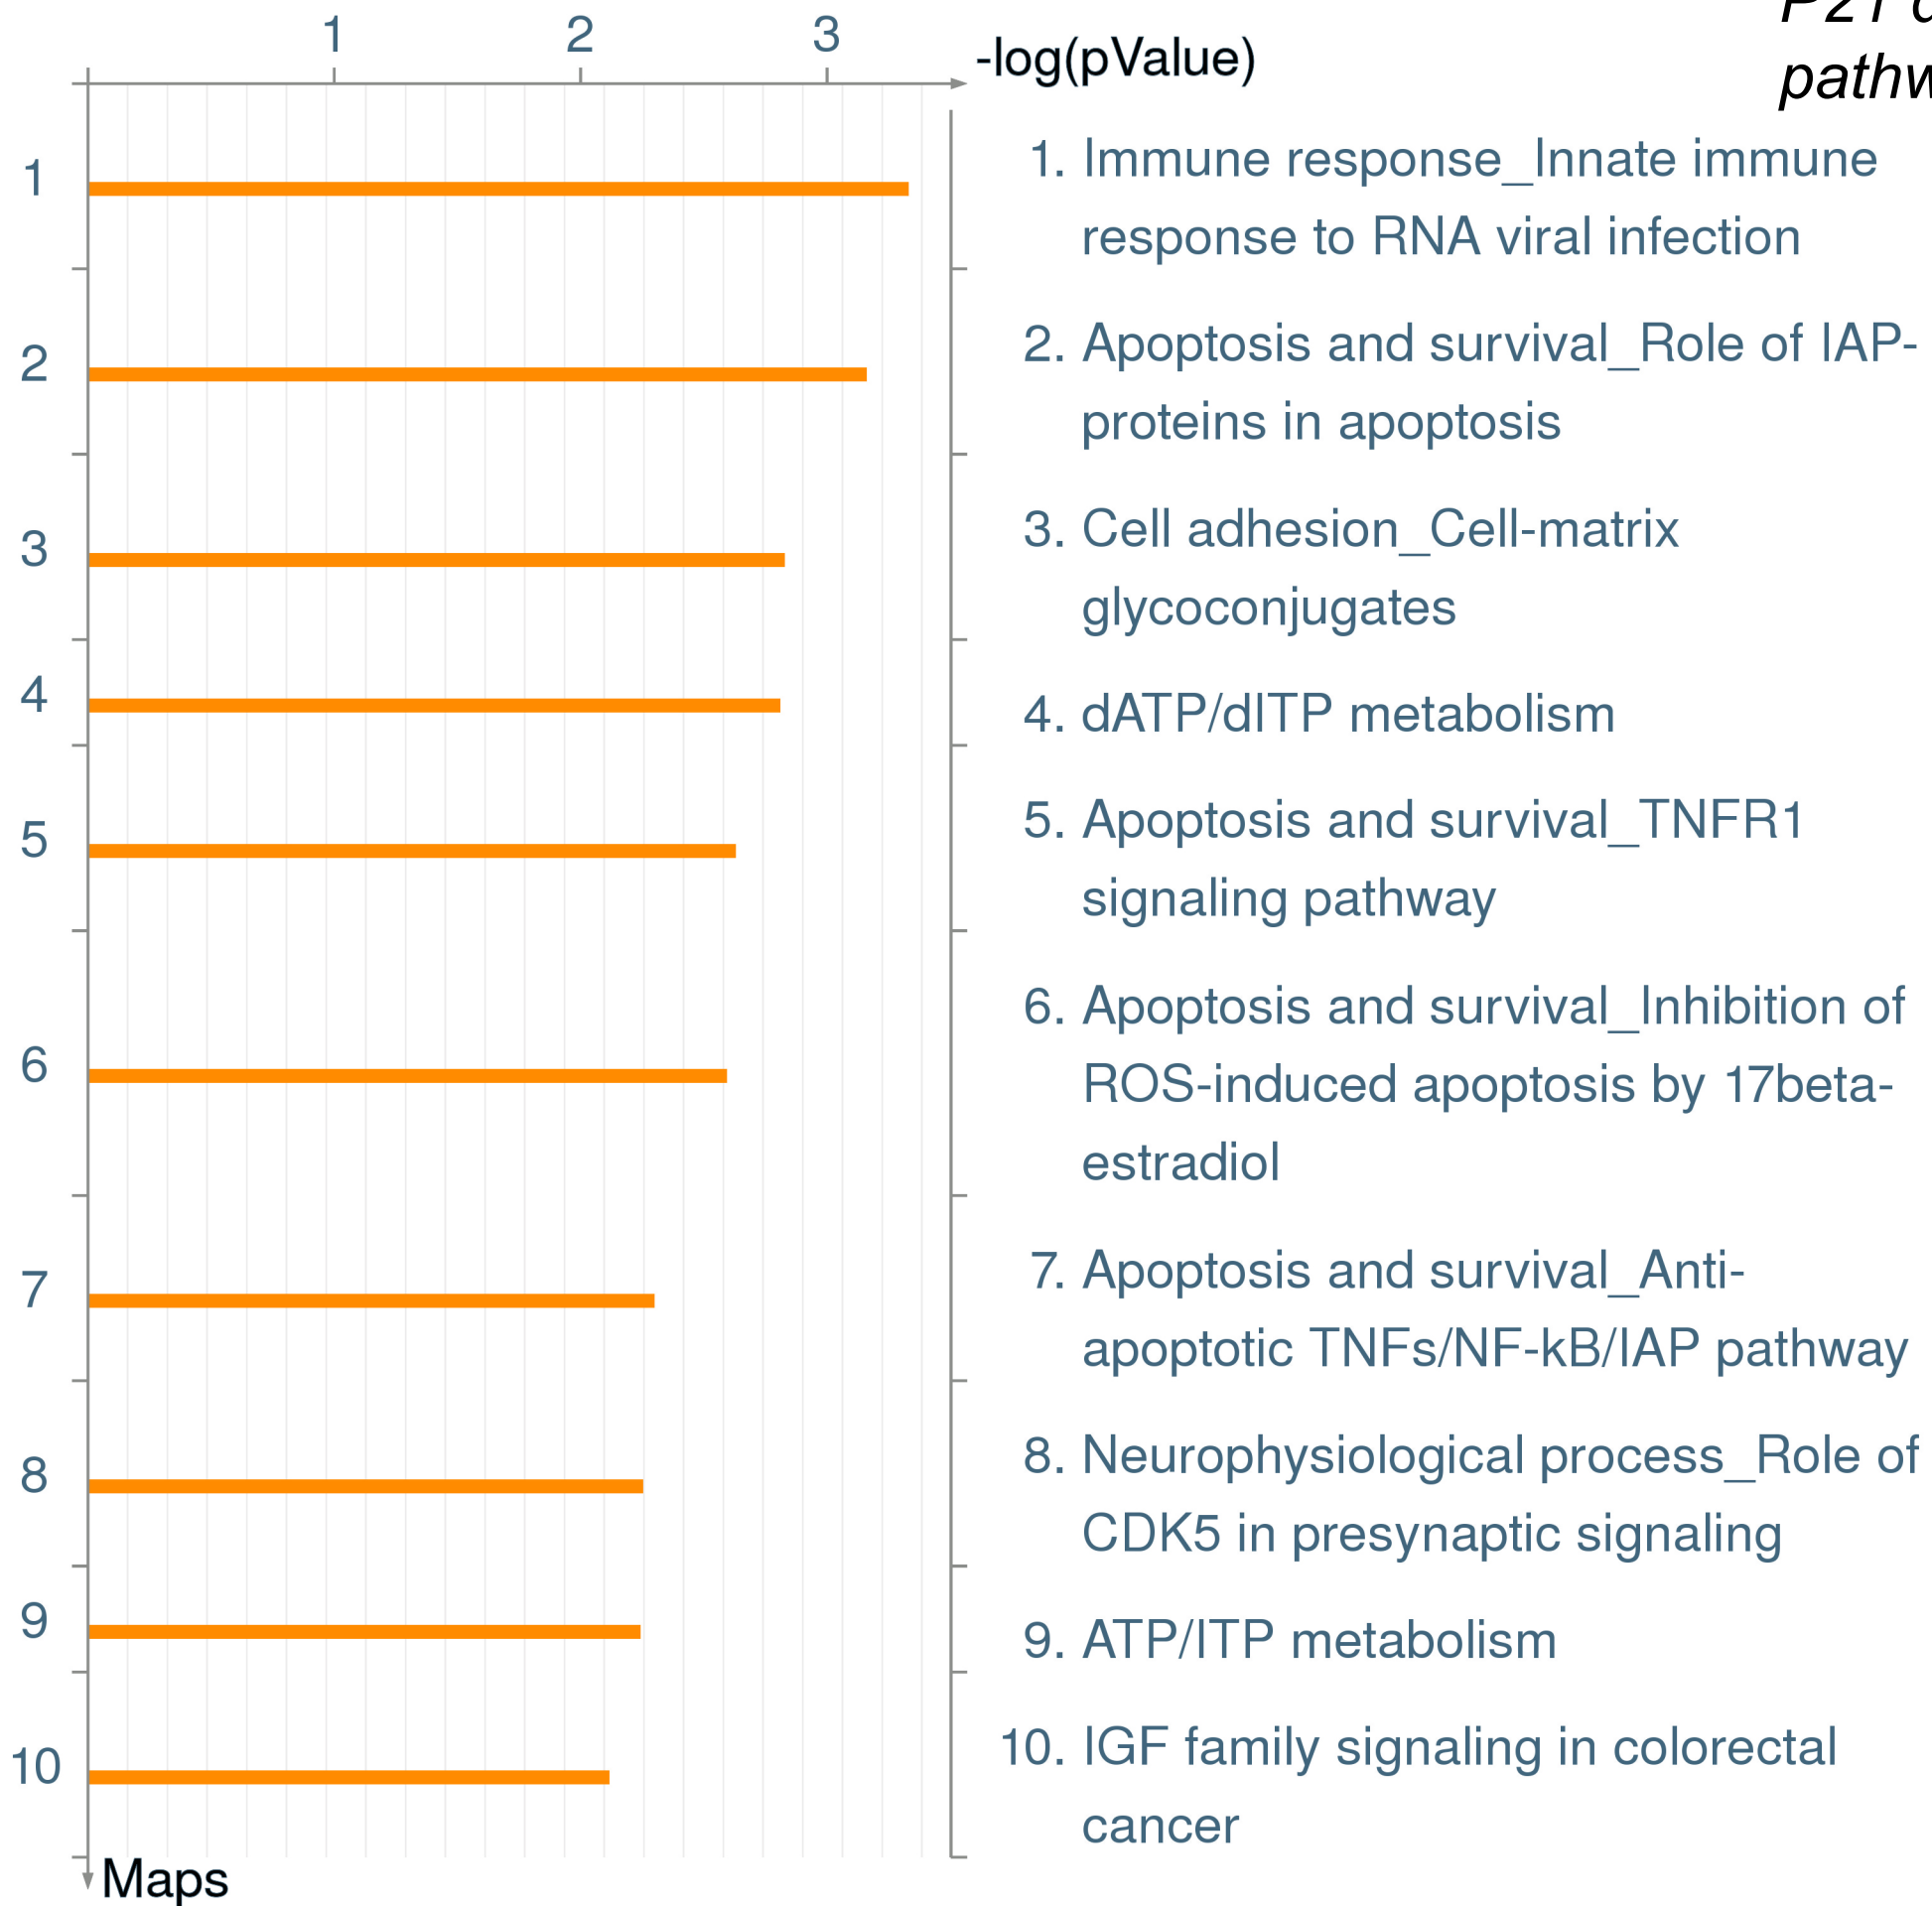

**J**

2 4 6 8 10

 $-\log(\text{pValue})$ *P21 upregulated  
GO processes*

1

1. positive regulation of RNA  
biosynthetic process

2

2. animal organ morphogenesis

3

3. multicellular organism development

4

4. positive regulation of RNA metabolic  
process

5

5. positive regulation of nucleobase-  
containing compound metabolic process

6

6. positive regulation of nucleic acid-  
templated transcription

7

7. positive regulation of transcription,  
DNA-templated

8

8. anatomical structure development

9

9. developmental process

10

10. positive regulation of macromolecule  
biosynthetic process

Processes

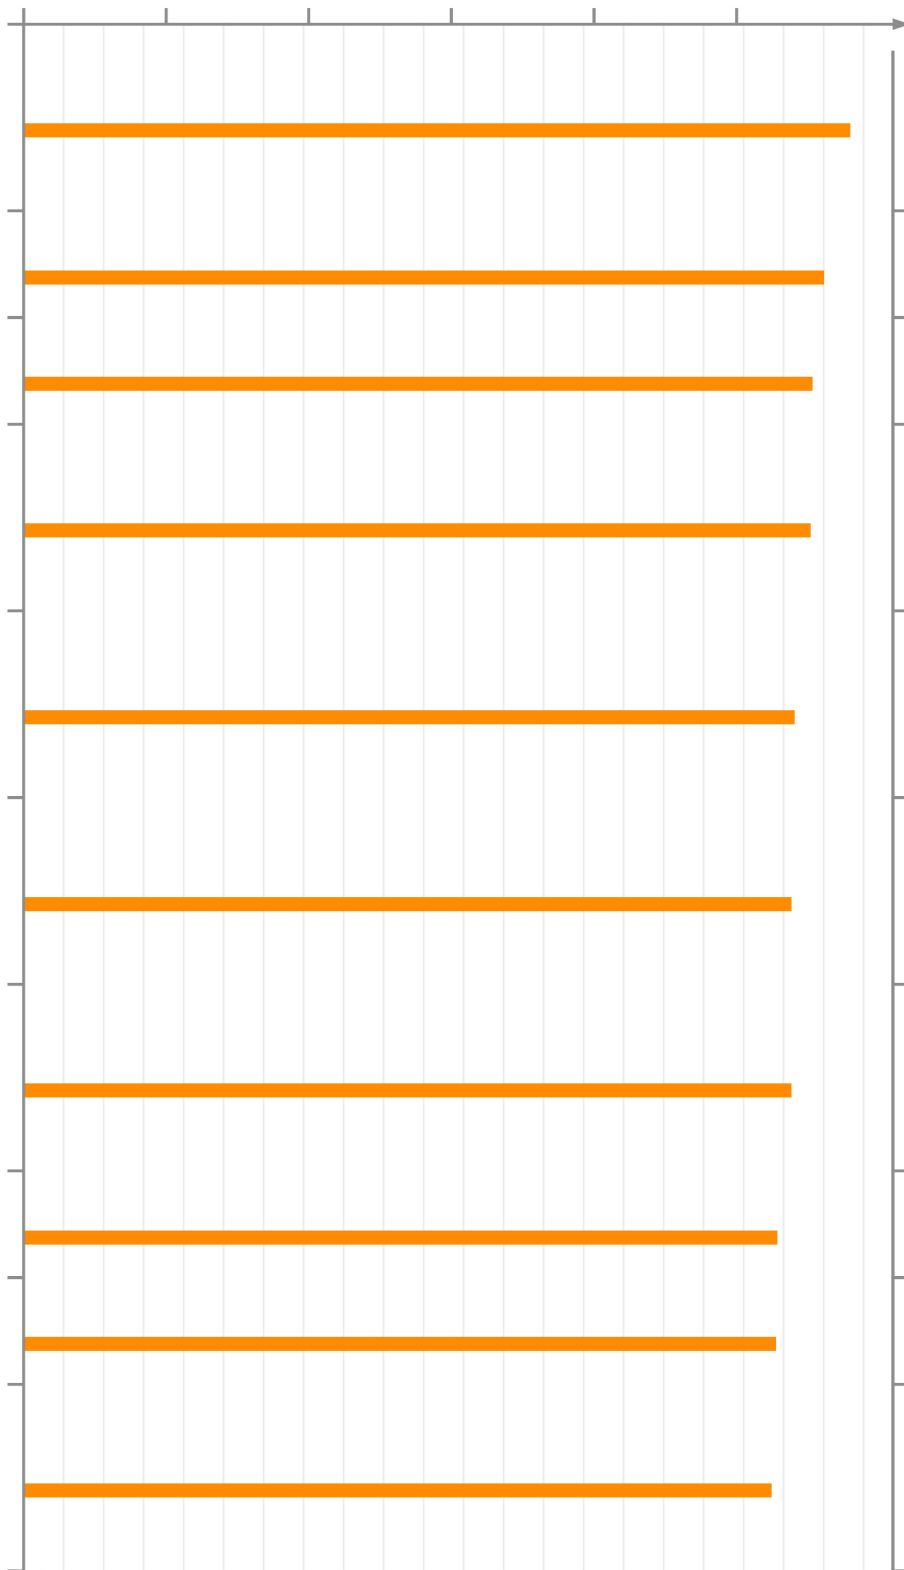

K

1 2 3 4 5

-log(pValue)

*P21 upregulated  
molecular functions*

1  
2  
3  
4  
5  
6  
7  
8  
9  
10

1. voltage-gated potassium channel activity
2. protein binding
3. potassium channel activity
4. basic amino acid transmembrane transporter activity
5. L-ornithine transmembrane transporter activity
6. arginine transmembrane transporter activity
7. L-lysine transmembrane transporter activity
8. core promoter binding
9. histone deacetylase binding
10. potassium ion transmembrane transporter activity

Molecular functions

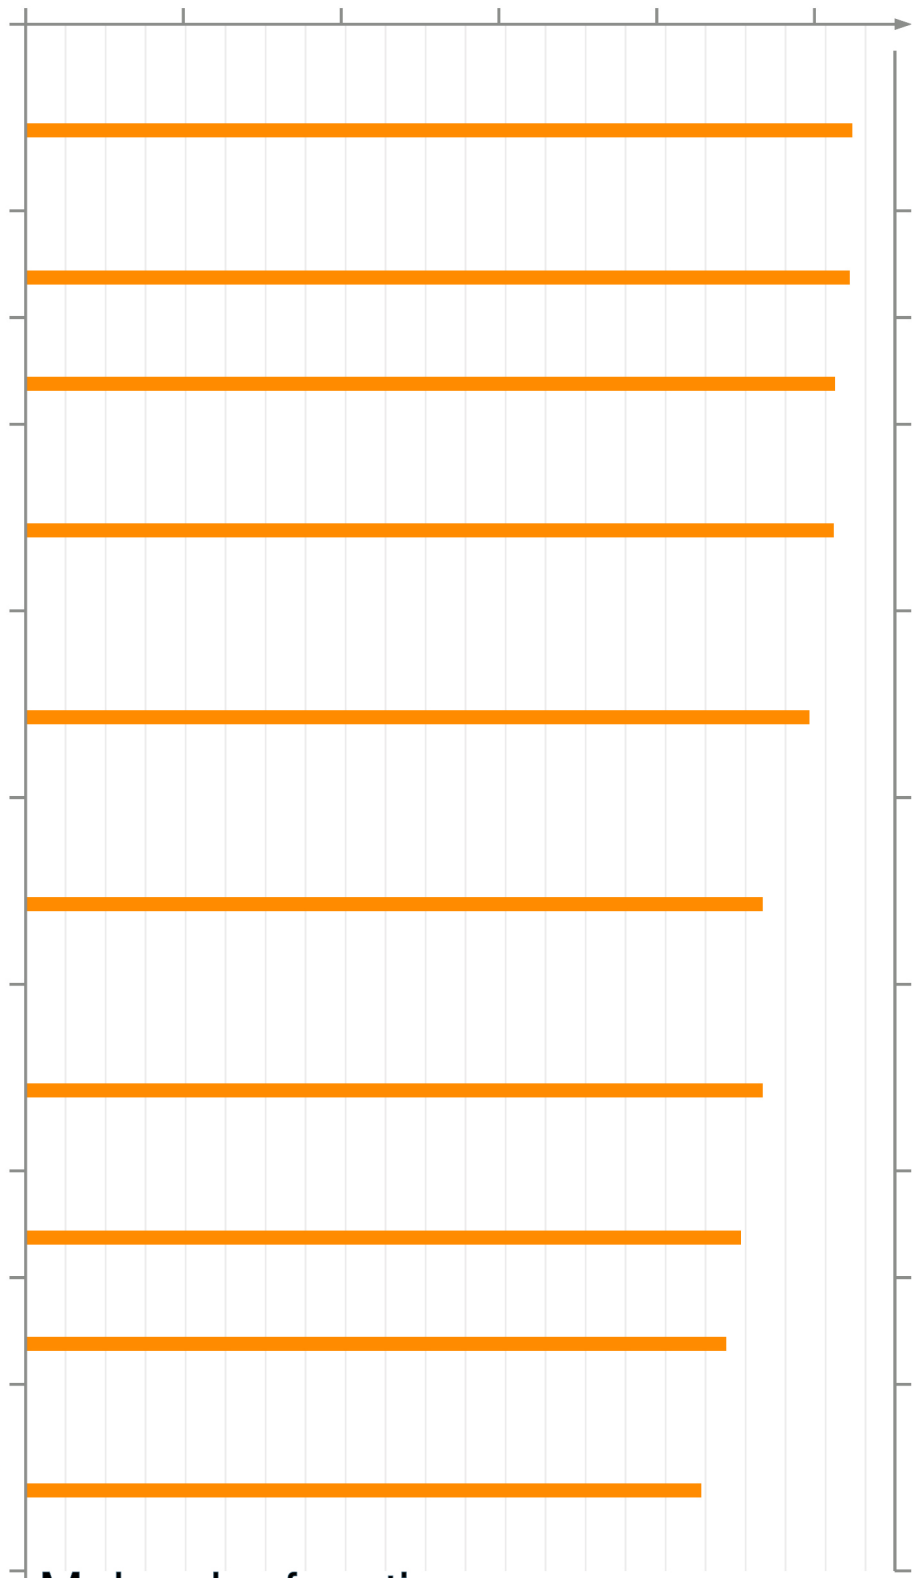

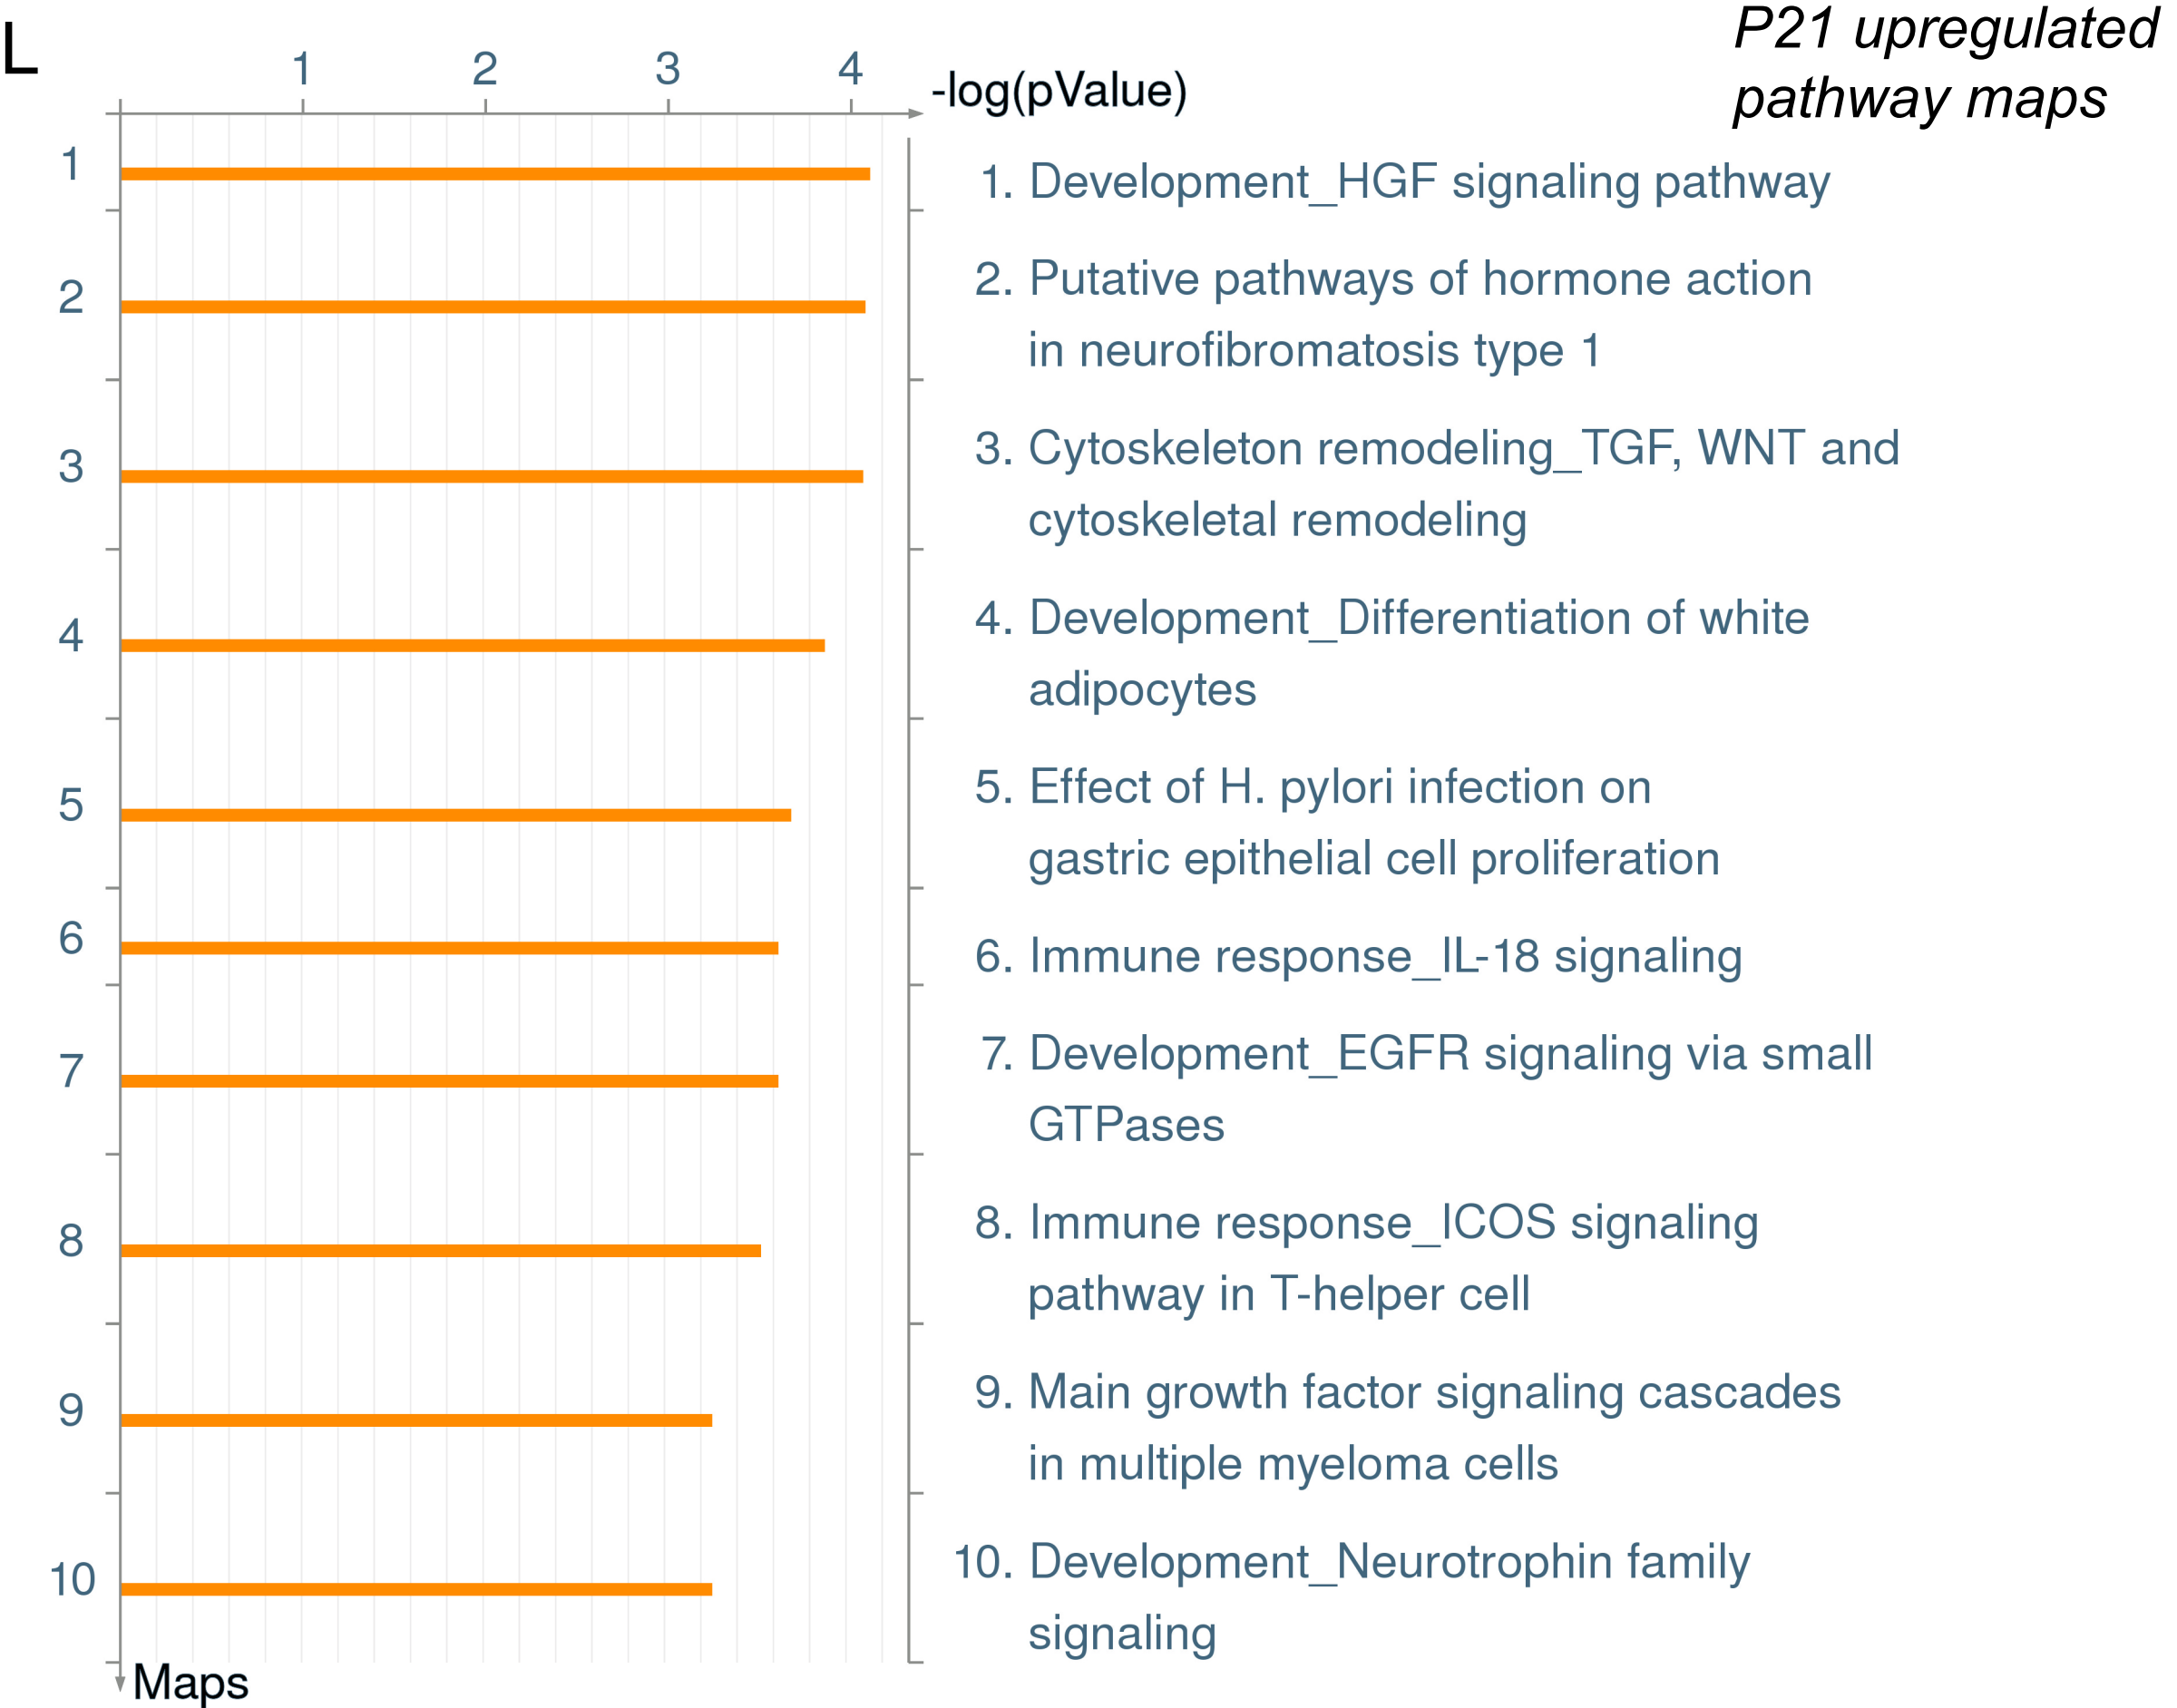

Supplement: JEM_20161714_DataS2.pdf [file JEM_20161714_DataS2.pdf]
